# Supplementary material for: Insights into luminescence quenching and detecting trap distribution in Ba2Si5N8:Eu2+phosphor with comprehensive considerations of temperature-dependent luminescence behaviors
Source: Royal Society of Chemistry journal article supplement (doi:10.1039/c5tc01849h), 2015-01-01
Supplement: c5tc01849h1.pdf [file c5tc01849h1.pdf]

## Electronic Supplementray Information (ESI)

### Insighting Luminescence Quenching and Detecting Trap Distribution in $\text{Ba}_2\text{Si}_5\text{N}_8:\text{Eu}^{2+}$ Phosphor with Comprehensive Considerations of Temperature-Dependent Luminescence Behaviors

Jin Wang,<sup>a</sup> Haoran Zhang,<sup>a</sup> Yingliang Liu,<sup>\*a</sup> Hanwu Dong,<sup>a</sup> Bingfu Lei,<sup>\*a</sup> Mingtao Zheng,<sup>a</sup>

Yong Xiao,<sup>a</sup> Mingying Peng<sup>b</sup> and Jing Wang<sup>c</sup>

<sup>a</sup> Guangdong Provincial Engineering Technology Research Center for Optical Agriculture, College of Materials  
and Energy, South China Agricultural University, Guangzhou 510642, China

<sup>b</sup> The State Key Laboratory of Luminescent Materials and Devices, School of Materials Science and Engineering,  
South China University of Technology, Guangzhou 510640, P.R. China

<sup>c</sup> Ministry of Education Key Laboratory of Bioinorganic and Synthetic Chemistry, State Key Laboratory of  
Optoelectronic Materials and Technologies School of Chemistry and Chemical Engineering, Sun Yat-sen  
University, Guangzhou 510275, P. R. China.

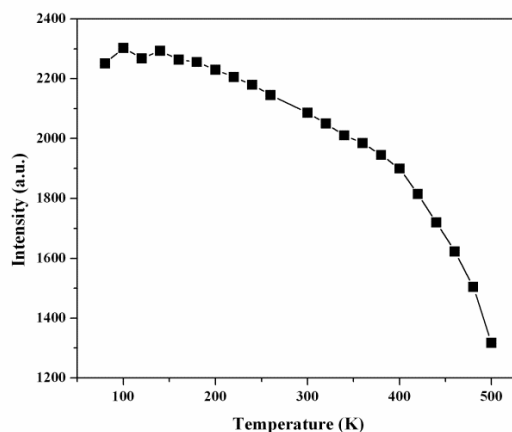

**Figure S1.** PL intensity as function of temperature (80-500 K).

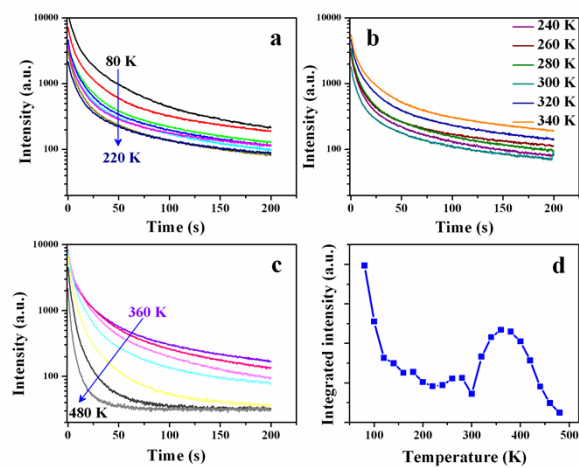

**Figure S2.** (a, b & c) Temperature dependence of afterglow decay curves (80-480 K) upon 300 nm excitation for 3 min, (d) dependence of integrated intensity of decay curves on temperatures. The limit time is set to 200 s.
